# Supplementary material for: Systematic synthesis of bisected N-glycans and unique recognitions by glycan-binding proteins
Source: Royal Society of Chemistry journal article supplement (doi:10.1039/d1sc05435j), 2022-01-01
Supplement: d1sc05435j2.xlsx [file d1sc05435j2.xlsx]

## Sheet: Lectins
	Glycans	ConA 10	STDEV	ConA 1	STDEV		AAL 10	STDEV		LTL 10	STDEV		SNA 20	STDEV		MAL-I 10	STDEV		ECL 10	STDEV		RCA-I 2	STDEV		WGA 5	STDEV		PHA-L 10	STDEV		Calsepa 2	STDEV	Calsepa10	STDEV		PHA-E 10	STDEV	PHA-E 1	STDEV		GS-II 10	STDEV		WFL 10	STDEV		GNL 10	STDEV
1	N4000	38293.5	1635.99	50	13.5892		1.5	1.73205		12	10.0333		-6	14.8549		-0.5	4.79583		11.75	15.0194		152.25	7.04154		42600.2	978.806		160.25	11.8708		22698	1084.51	38895.2	5776.32		28927	2147.03	9197	1206.95		2044.5	199.417		3.25	10.7819		2.5	3.10913
2	N4001	2145.5	134.011	0.5	1.91485		2.25	5.25198		5.25	2.21736		2.75	6.29153		-1.5	6.02771		10825.5	1051.75		46686.8	542.59		56.5	92.8745		2411.25	348.735		29944	4696.32	51025.8	7869.94		37568.8	1338.87	14842.8	2167.46		3.75	1.70783		9471	763.403		3.75	2.87228
3	N4002	34	17.224	0.75	1.70783		2.5	2.08167		3	2.70801		-6.75	6.18466		4	2.94392		5	4.76095		22	19.27		12917.5	937.312		994.25	111.362		3155.5	290.017	5816.75	2526.22		29760.2	1134.07	9536.5	262.996		3	3.91578		-0.75	1.5		1.75	3.94757
4	N4003	59.25	5.37742	0.5	2.38048		8	12.7017		7.75	2.62996		10941.8	672.428		-1.75	2.75379		7.25	3.5		46565.8	590.67		103.75	51.8419		4.25	1.70783		15431.2	5585.88	24447.2	7798.61		713.5	293.387	28.5	38.4144		14	26.3439		-8.5	3.69685		3.5	2.88675
5	N4004	57.25	5.96518	0	0.816497		39855	932.454		17908.2	2033.78		-1	13.7356		-1	1.41421		1.5	5.19615		19.5	21.2995		97	98.5833		2.25	3.59398		2149.75	434.233	2800.5	1093.19		1731.75	647.329	71.25	9.39415		9	5.22813		-7.5	17.9351		3.75	3.40343
6	N4005	35.25	10.2429	0	0.816497		37935.5	844.23		121.25	42.2483		-10.5	10.0167		-2.25	2.87228		0.75	4.85627		14.5	23.8397		18032	1336.7		24.5	19.3649		264.5	181.421	638.5	148.046		7683.75	1350.77	489	96.2185		2.75	18.715		-5.25	9.10586		0.5	1.73205
7	N4111	38420	557.52	8.25	2.75379		3.75	1.25831		2	1.82574		1.75	6.80074		0.5	3.69685		8765	707.492		46819.8	1123.08		177	56.8565		42	22.1961		35396.5	1397.12	48159	2622.15		15681.8	765.513	3121.75	612.882		504.75	43.1615		4002.75	538.83		1	2.82843
8	N4112	16996.2	475.384	1.25	0.957427		9.25	15.8824		2.25	3.30404		-15.5	8.88819		-1	0.816497		6.75	13.5984		19	14.8099		8493.75	583.116		6	3.74166		3955.75	310.91	10715.8	1619.27		23940	1963.14	3167.75	295.621		192	36.6242		1	4.39697		0	3.26599
9	N4113	24854.2	898.185	4	0.816497		0.25	2.21736		2.5	4.20317		10444.8	742.479		4.75	9.53502		10.75	13.099		43120	998.139		127	9.89949		7.5	3.41565		27968.2	2941.99	37347.2	7250.28		15826.8	2826.89	2625.5	338.454		305.5	36.9369		-7.25	6.94622		3.5	2.38048
10	N4114	19322.5	1108.81	1.5	1.91485		35294	3346.51		8213.25	2007.08		3.25	3.59398		-0.5	3.87298		2.25	3.0957		13.75	18.2825		168	32.5883		33.75	22.9982		6373.5	1429.75	13746.2	2207.72		15778.5	2296.28	2915.75	406.609		888.75	175.948		-9.75	5.67891		3.25	4.19325
11	N4115	1948	111.056	2.25	2.21736		35644.5	2610.74		7.25	1.89297		-10.5	9.39858		-0.5	1.91485		3	3.65148		26.25	14.975		18736.2	1007.71		5.25	2.98608		523.5	209.069	743.75	287.779		11507.2	1913.67	991.5	168.637		89.5	41.7732		-21	29.5184		-1	4.83046
12	N4122	37.75	12.5266	0	2.70801		2	1.63299		1.5	3.69685		-10	3.55903		1	5.22813		710.25	87.8839		49804	464.248		6787.75	210.302		500.25	46.3132		4884.5	501.647	10829.2	978.493		28630.8	1829.66	12581	638.505		-2	6.21825		-26.75	29.8817		3	3.3665
13	N4123	1076.5	123.711	2	2.16025		1.25	4.92443		1.25	2.98608		7529	59.6937		-2.25	3.30404		1475	61.3732		51371.5	238.909		208.5	77.5478		600.5	58.3638		30403.2	2076	43567.8	2890.72		27204.2	1192.8	10694.8	1724.52		1.75	7.18215		-6	4.83046		1.5	3.10913
14	N4124	39.25	4.99166	0.25	2.5		29742.8	4853.24		9053.5	858.558		-8.5	9.67815		-3	1.82574		2229	174.19		48895	1326.25		274	24.6712		1106.75	92.1679		5001.5	447.153	11495.2	1378.44		28124.8	1431.69	12495.8	1317.77		5	12.5167		685.75	87.5685		1.5	2.64575
15	N4125	17.75	14.66	-1	1.82574		35241.8	5308.43		11.25	6.39661		-11.5	7.32575		1.75	3.40343		757.25	32.6739		48802	1338		14832	1178.78		380.5	48.4596		758.75	100.105	490	592.017		36512.2	2049.07	11575.2	407.108		0.75	2.87228		-0.75	3.77492		2.75	3.59398
16	N4133	40.25	3.40343	-0.5	0.57735		4.5	10.4083		0.75	4.272		2655	220.744		-3	4.76095		1	2.44949		32728.8	893.119		561	78.9388		715.5	52.8551		16328.2	3325.11	31818.2	1820.22		32273.2	3423.02	12701.8	1296.68		2	3.16228		-1.5	5		1	3.82971
17	N4134	28.25	12.3659	-1.75	1.70783		27026.8	783.057		5563.75	232.118		-12.5	8.18535		16.5	17.767		0.75	4.71699		26.75	14.9304		585	86.151		1106.25	204.503		1735.75	524.138	4525.5	497.242		30242.5	1450.83	8970.5	265.875		-0.25	4.5		-3.5	11.619		1.75	3.68556
18	N4135	16	14.7196	0.5	1.29099		24336	504.572		3.75	2.62996		-5	12.5698		8.25	8.09835		1	3.55903		16.75	17.6517		18464	1155.36		450.5	60.6328		441.25	76.2031	1298.25	226.254		25431.5	2004.44	8515	1602.18		1.5	5.44671		-3.75	12.79		0.25	3.20156
19	N4144	26.75	14.523	-1	2.44949		27529	2880.88		3905.75	590.564		3358.25	341.36		-1	4.24264		1	2.94392		18386.8	2315.68		557.75	75.5618		-2	6.37704		706.75	303.344	1385.25	274.695		27.25	57.0343	-7	3.91578		-10.75	10.7199		-57.5	23.9792		4	1.41421
20	N4145	24.75	12.7115	0.5	1.29099		17689	2792.23		4.75	2.21736		297.5	123.926		-1	3.82971		788.75	278.171		10273	1361.68		4290	868.422		294.75	89.504		196	144.649	180	480.558		22.25	16.2763	2.75	24.4728		-10.5	3.10913		154.5	339.762		0	5.94418
21	N4155	37.5	9.46925	0.5	1.73205		37340.8	1101.37		3311.75	123.772		-6	12.5167		-0.25	3.30404		2.75	3.77492		21.75	16.2763		8549.25	1422.17		-0.25	0.957427		-11.75	11.7296	2563	5079.38		470.5	46.6297	17	3.3665		-11.5	9.29157		-4.75	11.6154		4.5	2.64575
22	N4211	34506	9289.2	310.75	185.728		1.25	2.5		2	1.82574		-3.5	4.3589		-2.75	2.21736		2675.75	186.425		48053.5	443.411		43288.2	1226.7		2237.5	271.441		20016.8	1907.22	35389.2	5543.34		39720.5	1970.22	20639.8	530.025		393	115.311		250	48.5318		1.5	3.31662
23	N4212	29213.5	5409.5	76.5	10.5357		0.75	2.21736		0.75	5.37742		0	5.2915		0.75	4.34933		1.5	4.65475		27.5	7.54983		43087	552.448		1767	30.9516		11844	686.068	26206.5	4547.16		34862	1320.7	18508.2	4293.49		66.75	6.55108		5.75	8.73212		1.25	3.40343
24	N4213	30812.8	6232.4	171.5	47.3674		0.5	2.38048		3.5	2.88675		4576.5	143.431		-0.75	4.11299		3.25	4.64579		34054.5	1495.77		37593.5	721.326		8.25	10.5317		12128.8	1771.87	24813.5	2464.27		2928.25	829.4	216.75	30.3576		70	21.3229		-33.25	23.0416		1.75	3.0957
25	N4214	28072.2	2969.54	169.25	77.2717		32123	868.284		6511.25	209.939		-9.25	11.3541		-4.25	2.5		3	2.44949		18.5	15.6312		32290.8	1020.17		4.5	1.29099		15706.8	1566.62	28382	5028.32		3753	314.625	101.5	5.19615		321.5	57.9569		-16.75	5.7373		1.5	2.08167
26	N4215	8261.75	466.333	1.5	1.29099		33559.8	447.593		3	4.96655		-3	4.39697		-2.75	1.70783		1.5	2.38048		-2.75	0.957427		41063.8	1054.87		14	12.7017		4810	131.029	12708	1577.15		4402.5	2296.97	207.5	41.4608		8.75	4.99166		-29	30.9085		0.25	5.90903
27	N4222	2.5	1.73205	1.75	1.5		0	5.71548		2.75	3.77492		4.5	3.10913		-2.75	4.11299		2205	1469.89		41388.2	251.082		713	143.381		1002	191.789		16169	1679	30325.2	3300.16		29784.5	1364.43	13220.8	1321.93		-0.5	9.57427		542.5	377.776		2.25	3.86221
28	N4223	34.25	20.0728	1	1.41421		-1.5	0.57735		2.25	3.5		3174.5	129.863		-2.5	1.91485		2826	340.268		51009.2	1716.84		1151.25	129.528		1.75	2.5		14934.2	355.23	28786	2309.67		132.5	25.8005	8	6.21825		-13.25	7.97392		828.75	57.3084		4	2.94392
29	N4224	57.75	7.97392	1.75	1.5		35902.8	3346.16		4311.5	1053.52		-2.25	1.5		-0.5	3.10913		5745.75	847.903		46499	1120.15		1181.25	136.324		4.5	4.65475		17385.8	1190.01	36757	3197.98		3425	229.357	98.75	5.37742		4.5	2.88675		3287.5	309.824		-0.25	2.5
30	N4225	28	11.1654	-0.25	0.957427		28964.2	1028.34		5.25	3.20156		0.25	3.59398		1.25	1.70783		3036.5	280.681		46132.8	735.526		1378.75	210.067		3.25	2.62996		14246.8	1243.63	29979	2228.99		3455.5	479.681	109.25	10.7199		2	3.82971		889.75	40.2606		2.25	3.40343
31	N4233	10.5	8.88819	0.5	4.12311		-0.5	3.69685		-1	4.08248		356	45.1294		-2.25	2.98608		-0.75	1.25831		3032.75	276.883		2315.75	288.23		-0.5	1.29099		1151	128.634	3309.25	685.938		103.25	12.0934	3.5	5.32291		-4.5	3.31662		-3	12.1929		0.75	3.86221
32	N4234	23.25	9.28709	0	2.16025		29736.8	405.481		2485.5	194.313		-21.25	9.60469		-0.25	3.30404		3.25	3.77492		30.75	3.77492		1712.25	134.354		0.75	0.5		2927.5	437.55	9404	1239.08		1621.75	194.599	60	10.3602		-14.25	9.21502		-11.5	7.54983		8.25	15.174
33	N4235	15	5.35413	0.5	3		29643.2	443.054		1.75	4.64579		-17	9.12871		1.25	4.34933		4	3.74166		18	11.1654		16600	1021.33		-3.25	8.05709		1475	150.042	4281.25	388.125		3365.25	497.431	62.25	2.98608		-14.75	6.13052		-9.25	7.80491		3	0.816497
34	N4244	49.25	3.30404	-1	1.41421		28442.5	2535.64		1855.5	76.361		5150.75	331.705		-2	3.26599		5.5	1.29099		41881.2	770.959		1156.5	86.5082		-4	13.4907		18083.8	650.654	31239	4115.42		719.75	116.549	28.75	5.61991		-14	6.0553		-15.25	9.21502		3	2.44949
35	N4245	16.75	13.6473	-0.5	1.29099		31196.5	1265.48		2.75	3.30404		2451	69.9667		-4	4.08248		2	2.44949		45290.5	1270.1		1732.25	275.878		3.5	0.57735		13636.2	815.353	26207.8	2255.39		2324.5	326.182	47.5	2.64575		-21.25	2.62996		-7.25	6.55108		-0.25	1.25831
36	N4255	32.5	3.87298	-1	1.1547		42494.8	2456.87		9277.75	384.888		-13.25	3.86221		-4	3.55903		1	3.3665		12.25	6.70199		1508.5	304.265		3.5	1.91485		70	104.569	1269.5	863.761		4295.75	375.324	73.25	12.842		1.5	1.29099		-20.5	9.94987		-1.75	2.5
37	N000	41619	1746.49	12698.5	1772.58		0.25	4.64579		8	2.44949		5.5	4.20317		6.25	5.37742		1.25	6.23832		19.25	12.2848		31.5	45.5229		3.25	2.98608		15946.8	2869.36	35690.2	1856.69		7993	646.666	313.5	53.1319		5718.25	880.665		1.25	10.4043		6428.25	2040.41
38	N001	44015.8	1006.21	12602.2	2841.66		-1.75	2.98608		5.75	2.62996		-3	7.52773		238.25	19.0504		10468.8	528.994		45747.5	582.08		85.5	33.2014		42.5	23.7978		19326.8	3626.58	38294.2	2892.65		15443.8	2852.49	2565	240.031		1.5	8.5049		10960.5	733.353		2551.75	287.967
39	N002	42431.8	631.76	2591.5	501.281		4.5	4.12311		4.5	3.69685		-9.25	6.84957		1200.25	97.889		4.25	1.5		151.25	9.10586		18140.2	619.523		39.5	23.7276		57.5	47.7109	285	275.072		16094.8	63.8455	4418.5	272.707		3.75	44.5524		7.25	17.9141		18.5	28.5015
40	N003	44375.2	1903.38	2977.25	162.674		0	2.94392		3	0.816497		7506.5	498.339		-1.5	2.88675		3.5	1.29099		43616.2	621.086		104	11.9722		-2.5	6.245		13082.5	2293.52	25809.5	1709.26		21.5	33.8083	-0.75	1.5		-7.25	5.56028		-1	16.8918		7.5	3.78594
41	N004	42951.2	827.66	2526.25	196.859		35698	487.037		25405.5	3999.54		5.75	9.81071		-0.5	4.65475		4.75	3.0957		30079	641.718		144	54.2402		32	15.7692		1294.25	147.696	1473.75	311.341		6848	975.615	483.75	40.0947		4.25	14.7054		14.5	12.8712		53.75	11.471
42	N005	40419.5	753.815	537.75	52.3283		38629.5	802.383		357.75	42.8826		-12.5	11.2101		1.5	2.64575		1.75	2.06155		394	54.8148		27446	721.772		6	4.54606		-10.5	15.5456	471	491.77		5291.25	723.931	242	22.1058		-17	6.48074		-0.25	23.7259		5.5	3.10913
43	N111	44908.8	746.322	13673.8	2188.27		5.75	12.7115		6.25	1.70783		6.5	7.85281		7.25	11.0868		11131	908.823		47936	314.38		36949.2	1499.39		13.25	14.5688		19369	4438.05	34615.8	866.228		11577.5	667.453	785	141.162		1575.5	183.016		8781.5	1443.62		5917	1248
44	N112	41101.5	4115.57	9842.25	1025.02		2	7.43864		5	2.44949		-19.25	2.98608		279.5	54.4334		5	2.44949		497	37.0225		36682.2	668.447		5.25	3.68556		841.25	257.351	881.75	904.279		12974.2	1870.54	1018.25	166.53		423.25	164.017		6	14.3295		154.5	12.3693
45	N113	42172.5	784.978	10548	920.76		-1.5	1.91485		4	1.41421		13589.5	229.214		1	1.63299		7.75	1.25831		35176.8	843.837		280.5	60.2799		1.75	4.19325		22838.8	767.039	37235.8	3060.91		474.25	217.262	18.25	5.31507		260	12.7279		12	51.0686		99	51.7043
46	N114	41396	856.283	19254.2	1476.84		30467.8	452.346		15660	601.905		-8.5	17.0196		0.5	4.04145		2	2.82843		92.5	32.6752		248.5	59.1974		17.5	12.3962		2419	545.375	4619.5	1005.07		10824.2	977.465	1243.75	282.533		868.5	106.816		-6.75	14.4078		135.75	39.7188
47	N115	40817.2	2540.06	10373.8	427.763		30101.2	825.088		72.5	6.80686		-13.5	11.8181		0	0.816497		5	1.1547		7.75	4.92443		10291.2	643.773		4	4.24264		17	4.83046	232	180.302		7362.75	908.749	601	38.2274		-10	16.2686		-3.75	13.2004		3.5	3.87298
48	N122	42726.8	1077.65	7967.25	445.116		-2.75	3.59398		3.25	4.03113		-9.25	7.22842		923.5	158.454		2017.75	168.306		42604.8	925.085		1101.75	429.074		18	13.5892		1186	309.478	1695	425.968		11656.2	796.401	1605.25	100.005		-4.25	13.6473		320.25	67.2526		54.75	5.85235
49	N123	38369	3937.1	6972.75	2084.39		25.25	1.70783		6	2.16025		8243.25	1374.95		31.25	3.30404		1923.75	223.966		45803.2	1651.93		261	90.0925		15	6.32456		18935	1125.35	26400.5	9171.65		3706	655.01	194.5	11.3578		-3	20.166		244.75	76.4651		94.25	33.3804
50	N124	45421	2662.4	5084	3134.74		31556.8	2896.73		9654	685.253		-0.75	1.70783		40.5	5.06623		3299	253.264		38348.8	2786.17		618.5	194.541		58	5.2915		2112.75	297.341	2872	1829.34		17220	868.768	2890.5	478.59		11.75	12.6326		1641.25	80.193		36.5	21.362
51	N125	42548.5	1430.6	3298.75	455.853		30121.5	1256.12		71	6.97615		-5	5.03322		7.75	7.88987		1512	114.33		37415.2	726.875		4195	703.206		46.25	4.11299		12.25	21.2662	754.5	210.297		16651.5	712.143	1803.25	33.7676		-3.75	6.0208		42	19.799		2.25	2.5
52	N133	45483.2	1024.45	3619.75	589.244		0.25	1.89297		2.5	2.08167		4290.5	360.434		866	118.729		5.25	1.25831		37545	6016.04		642	66.9677		38.5	4.04145		12555.5	1471.79	29049.8	2860.16		17384.2	1810.66	2355.75	596.34		-3.5	1.91485		-9.75	10.5317		4.25	2.87228
53	N134	43638.5	782.931	5573.25	607.319		27025.8	946.416		4956.75	747.086		-17.75	10.4363		1420.25	135.079		4.25	2.98608		240.25	9.46485		622.25	58.0079		61.5	6.13732		8.25	49.9491	2715.25	3914.35		14507.5	1464.88	3669.25	694.891		3.25	6.80074		7.75	10.2103		13.25	10.8743
54	N135	41565.8	1224.44	1843.5	260.776		26622.8	750.182		19.5	16.1967		-20	5.35413		268.25	52.6332		2.75	1.5		355.75	25.3558		17004.8	1279.11		30.75	11.3541		-6.25	20.6135	1850.5	3003.95		12354.2	1272.14	1822	559.726		2.25	7.97392		9.25	2.5		3.75	2.87228
55	N144	43243.5	885.719	3766.25	1535.28		28968.2	4690.09		5617.5	162.042		994.5	81.9817		4.75	9.74252		4.25	4.99166		14677.8	1068.79		539	132.305		-3	7.39369		418.75	50.1423	20.75	173.063		3034.75	358.498	140	25.9615		-18.75	21.4845		-5.25	7.41058		5.5	6.95222
56	N145	40988	673.104	1483.5	635.644		28067	2992.47		12	19.6129		143.25	33.5298		1	1.41421		0.75	3.86221		9906.25	769.272		908.5	222.4		1	5.59762		25.75	16.8992	247	115.873		3279	610.575	146.25	21.5619		-4.75	6.99405		-0.5	18.1384		1.25	2.62996
57	N155	43386.8	2981.3	359.25	190.664		42305.8	1415.36		5671	478.774		-10.25	12.4197		-2.25	2.98608		3.25	2.36291		2437.5	266.486		1294.25	145.144		8.75	2.98608		44.25	92.7699	660.25	397.601		8206.25	1138.9	278	73.3258		-0.5	4.12311		-2	0.816497		2.5	2.08167
58	N211	44800.5	1019.99	11278.5	1627.65		-0.25	2.21736		2.25	4.03113		1.5	1.91485		54	8.60233		4272.25	407.756		38779.5	2169.73		993.5	283.908		22.25	17.5381		11678.5	2962.01	27561.5	3062.9		16434.8	1834.59	1998	548.998		2335	368.072		1721.25	199.717		3147.5	241.768
59	N212	43158.8	951.243	5373.25	2302.11		0.75	2.21736		2.75	4.85627		-5.25	7.18215		1639.5	191.253		4.5	3.41565		842.75	150.103		1399	494.075		59	4.96655		4165.5	771.864	10939.8	1625.62		15013.5	1533.47	3507	383.956		1149.75	257.33		24	14.4453		303.75	68.8301
60	N213	43174.2	222.801	4463	2094.59		-2.25	4.57347		1.5	2.88675		2302	420.744		0.75	3.40343		7	2.44949		18649.5	1051.56		534.5	100.427		3.75	3.0957		4715	727.927	8202.75	1092.13		434.75	90.9189	23	5.35413		656.75	185.938		3.25	13.5247		403.5	29.1833
61	N214	45255.8	2081.37	5316.75	443.446		32407.8	222.076		13287	1297.97		-2.25	9.84463		0	2.70801		2	1.41421		16842	1540.77		391.75	64.0592		9.5	13.0767		6438	1206.5	12775.5	1524.95		3852.75	963.894	183.25	27.4515		1759	359.052		3	10.8628		1389.75	111.805
62	N215	41858.2	574.485	3031.5	382.788		31035.8	1230.5		60.25	6.23832		-9.75	12.6062		1.25	3.30404		4	1.82574		1326	52.6181		1095	162.446		-8.5	5.91608		1910.75	292.055	1202	1570.84		3647	915.549	107.5	19.3305		1092.5	224.953		1.25	5.79511		176.5	45.5668
63	N222	46048.2	904.465	4120.75	975.306		-0.25	2.06155		2.75	2.87228		3	2.70801		2615	253.336		4156.5	220.512		48123.2	956.067		733	109.945		4.5	4.43471		8443	1499.29	13357.5	8799.17		14180	1362.7	3533.75	362.982		3.25	7.80491		1091.25	122.484		58.75	4.85627
64	N223	50702.5	2143.62	2327.75	1434.95		-1.5	3.31662		1.25	4.03113		1820.25	341.301		3.25	9.21502		4038.5	346.545		47698.8	2286.18		1340.25	125.351		2.5	0.57735		7877.25	854.076	21176.8	1648.88		2051	452.355	57.5	10.5987		0.25	4.272		1479.5	77.5478		177.25	39.4747
65	N224	45595	2572.92	2986.75	1452.43		35282	3374.37		9943.25	329.788		-6	10.8321		1.25	2.75379		4801.5	2006.54		47045.2	639.984		1247	247.848		5.25	0.5		8282.25	1528.94	24596.2	3659.13		4981.5	840.705	150	36.1202		11.75	18.9099		4384.5	606.778		854	151.253
66	N225	42351.2	866.243	2500.25	185.649		36240	584.595		61.5	4.04145		-4.25	3.94757		0.5	0.57735		2956.25	389.925		45322	184.795		1737.5	124.152		4.5	1.91485		4350.25	317.143	13867.2	1317.31		4061.5	549.43	127.5	26.9629		12	14		1120	125.547		63	4.54606
67	N233	38985.5	303.203	1452.25	203.003		3.75	4.42531		2.5	2.88675		159	33.5162		37.5	5.8023		6.5	2.38048		5273	1375.87		1327.5	120.19		1.5	1.29099		12	14.4684	117.75	286.699		2657.25	468.279	85	30.8004		-1	19.6129		5.5	9.11043		9	1.82574
68	N234	43320.8	1953.4	1637	421.716		27996	2522.87		4343.5	190.728		-11	11.6333		56.5	6.60808		7.75	2.21736		25467.2	1537.26		1358.75	189.672		-3.25	4.64579		14.75	15.5215	527.75	300.674		4142.75	959.283	162.75	20.2711		3.25	7.22842		3	8.86942		25	16.3707
69	N235	29052.2	1594.27	973.25	126.732		22134.2	457.796		11.5	3.87298		-2.75	3.40343		33.75	5.31507		4.5	2.38048		8261.5	1048.99		1673.25	226.195		2.75	12.4466		-2.25	32.0455	451.75	230.099		1549.25	412.253	122.5	51.449		-5	7.11805		6.25	10.9049		5.25	2.62996
70	N244	46812.2	1018.26	2587.25	229.182		35231.8	3704.39		5055.75	809.135		8253.75	1275.76		-2.75	2.98608		4.25	2.98608		45744.5	3090.11		1307.5	283.138		2.5	3.10913		13848	786.733	23797.2	7077.83		260	65.1818	12.25	0.957427		-8.5	17.1756		-5.75	9.63933		18.25	15.174
71	N245	46403.2	2839.95	305.5	168.927		31748.8	1792.44		8.25	3.77492		2650.5	385.432		-0.75	4.64579		4	3.16228		42532.8	253.762		1422.25	210.604		3	3.4641		8246	792.004	22888.8	2159.98		682	194.989	21.75	3.5		-1.75	3.59398		-0.75	2.36291		4	2.94392
72	N255	47204.8	3100.5	1408	155.801		39222.2	2990.33		6402.5	577.12		-2	2.44949		0.75	1.5		1	2.58199		6968.75	803.875		1397.75	206.324		3.5	3		8.25	24.5815	676.25	755.567		3975	1435.8	139.25	12.816		1.5	1.91485		-2.75	2.36291		3.75	4.99166
73	A3LNnT	10.25	10.3078	-2.25	2.98608		9.25	9.10586		3.25	2.98608		-6.5	2.51661		3179	523.646		2	4.16333		17.75	6.39661		12762	2110.15		-0.25	1.70783		-28.5	52.259	300.75	174.695		7.25	15.8403	-2.75	3.30404		22.25	18.6793		20.5	26.6145		1.5	2.08167
74	A6LNnT	21	6.48074	0	3.55903		8.25	12.1758		3	2.94392		7311.25	388.455		-6.25	4.57347		-2.5	3		27233	4022		1119.5	58.2552		1.5	2.08167		-19.25	44.657	735.25	1172.14		1	1.63299	0	1.41421		0.25	4.272		0.25	0.5		10	20.0167
	NC	32.5	7.85281	3	2.16025		1	2.94392		2.25	3.5		3	5.94418		7.75	11.5289		1.5	3.31662		46.75	7.22842		1468.5	241.01		1.25	8.77021		-23	15.6844	291.75	88.8158		1	1.63299	-0.75	0.5		-6.25	8.09835		2	7.78888		1.25	2.06155
	PC1	10201.8	3468.15	6968	1620.81		9156	3859.58		47	7.48331		10933.5	711.07		7229.25	1097.05		9748.75	459.366		6955.75	681.722		19616.8	1373.49		18	3.55903		-20.25	17.8396	122.25	263.911		8618.25	2073.11	6245.25	1898.79		-2	4.08248		25	20.3142		8431.75	895.407
	PC2	20700.5	1647.3	3116	424.725		4259.75	502.052		8.25	1.5		819.75	88.9058		47	3.74166		156.25	9.94569		4479.5	432.618		607.75	213.195		9.25	7.71902		6751	747.62	18387.2	1312.11		1237	105.398	119	9.4163		2.75	8.46069		15	15.5563		47.75	6.29153
	PC3	5850.75	137.323	186.5	31.1181		557.75	123.988		2.5	1.91485		214.5	13.9164		2.75	4.272		6.25	1.89297		569.25	61.6191		97.5	16.2993		2	3.55903		11678.8	984.964	24978.8	1442.67		10.5	6.13732	-0.25	0.5		0.5	1.91485		1	1.82574		2.25	0.5
	PCA	51074.2	1751.64	15557.5	2061.97		59.75	7.27438		150.75	14.5459		13283.2	105.664		47.25	8.65544		240.75	47.07		13939.8	606.048		472	84.8882		4.25	2.36291		28094.8	975.141	62759	800.692		118.25	8.8459	11.25	1.25831		4.5	2.64575		2.5	2.08167		228.5	101.036
	M	2993	237.912	710.75	224.749		2934.5	71.7612		2814.75	48.1759		3035.25	100.838		2892.75	78.6527		2908.5	171.807		2951	147.189		3868.75	188.018		3109.25	47.8566		22154	569.969	29312	1287.8		11721	645.697	11012.5	763.952		2889.5	60.8523		2941.25	22.9401		3085.75	142.507
[truncated: 4 more columns]

## Sheet: Antibody and Other
	Glycans	CD15s	STDEV		hE-Selectin	STDEV		Rat DCIR2 20	STDEV		PR8	STDEV		NY18	STDEV		CR32	STDEV		SP27	STDEV		A1	STDEV		Galectin-3 50	STDEV		Siglec-10 20	STDEV		Siglec-3 20	STDEV
1	N4000	2.75	6.07591		1.75	27.6451		9731.25	866.413		45.75	57.3665		6.25	4.85627		7	30.474		-42.25	7.13559		16.25	26.8375		5	37.6652		-11.75	7.18215		5	37.6652
2	N4001	38	20.4124		-16.5	3.87298		8.25	35.6499		28	10.0995		-1.5	1		-38.75	30.3466		-42.75	33.7676		-1.75	9.25113		3178.5	1161.67		-19.25	2.87228		3178.5	1161.67
3	N4002	19.75	34.529		-17	1.63299		19	8.04156		4060.5	411.613		-0.25	1.5		-18.5	10.6615		1721	203.825		1255.75	149		959.25	193.357		1254.25	469.299		959.25	193.357
4	N4003	0.75	4.11299		-23.75	2.5		10.5	45.5302		31.5	49.9366		805	207.742		971.25	102.018		-34.25	33.4801		614.25	91.6019		-56.25	14.198		2147.25	994.196		-56.25	14.198
5	N4004	-2.25	3.30404		-14.25	5.25198		18.25	31.7949		-29.5	29.5127		-0.5	3.10913		-79.75	49.3786		-67.25	15.9661		-8.5	10.5987		-33.5	41.1542		-33.75	4.99166		-33.5	41.1542
6	N4005	1.25	1.70783		3853.75	1028.07		-0.75	21.5155		2585.25	245.314		-2	1.41421		17	7.52773		5005.25	664.142		925.5	105.086		-66.25	55.524		1288.75	146.281		-66.25	55.524
7	N4111	29.75	59.7181		80.25	48.5412		6.5	9.67815		51.5	7.54983		-1.5	1.73205		-79.5	6.55744		-40.5	17.2143		-41.75	38.7503		44.5	15.2643		-24.75	5.7373		44.5	15.2643
8	N4112	35.25	31.4682		52.5	30.7517		21.75	60.6156		5235.75	923.797		-2.5	2.08167		-44.25	30.3136		593.5	81.3572		1452.25	149.754		620.75	396.828		4	9.27362		620.75	396.828
9	N4113	9	19.7821		67	34.7275		-17.5	67.7913		44	46.9113		32.25	15.9034		203.75	8.30161		-65.25	22.5148		1080.25	191.244		-45.5	18.8591		301.75	35.5375		-45.5	18.8591
10	N4114	30.25	32.2736		4.25	28.7562		14.25	23.9913		-13.25	6.39661		-1.25	3.20156		-80	24.2625		-56.25	59.4383		-6	20.445		-71.25	30.5873		-8.75	0.5		-71.25	30.5873
11	N4115	-1.25	6.60177		3680.25	249.774		0.25	45.763		3368.5	498.297		-1	2.16025		-15	12.3018		4967.5	283.756		573	45.5119		-68	25.807		33.5	11.2694		-68	25.807
12	N4122	-5.5	8.22598		2.75	41.0477		-45	52.4341		3192.5	280.231		-0.75	1.25831		-77.75	21.3288		340.25	18.3553		789.25	54.7928		1219.5	207.175		-2	7.43864		1219.5	207.175
13	N4123	1.75	8.4212		-12.5	4.72582		45.25	65.9261		45.75	14.1745		18.5	5.8023		57.5	23.3024		-75	31.3581		451.25	69.7776		-9.75	28.9871		193	85.9961		-9.75	28.9871
14	N4124	7.25	21.3756		17.5	18.5203		-7	28.6473		15.25	14.7054		-0.5	2.08167		-88.25	47.947		-53	21.7102		-14	7.87401		5	17.8326		-22.25	7.41058		5	17.8326
15	N4125	12.75	19.0153		3783.25	178.13		19.25	35.7806		5159.75	1866.66		-1	1.82574		-17.25	34.2479		4145.25	1045.84		1240	590.13		-26.5	20.1412		21.25	21.3912		-26.5	20.1412
16	N4133	14.75	12.9454		18.75	124.994		29.25	36.0959		1127.5	169.632		70	23.2236		137.75	13.0735		-5.75	30.5109		1960.5	620.553		84.75	50.381		5075.25	749.051		84.75	50.381
17	N4134	-4.25	5.25198		116.25	75.3188		33.25	18.1544		638.75	167.741		-1.5	3.69685		-90	31.4643		-25.75	21.1877		1106.75	69.3415		138.5	25.3837		138.5	49.4941		138.5	25.3837
18	N4135	12.25	29.3641		2642.25	268.836		1.5	77.1514		4224.5	289.074		-2	2.44949		19.5	20.4858		3491	436.528		1464.5	218.224		-20	8.44591		1595.75	795.598		-20	8.44591
19	N4144	-3.5	8.22598		-81.25	8.65544		-41.75	49.8088		-5.5	34.7803		-2.75	3.86221		0.5	17.3109		-1.5	16.1348		15	29.5635		-42	29.9444		4.25	12.1209		-42	29.9444
20	N4145	-6	6.78233		2260.5	388.109		-2	14.8773		3012.75	667.913		23.25	11.1766		212.25	55.548		3199.25	593.85		1107	194.992		-56.75	57.8237		299.75	37.7039		-56.75	57.8237
21	N4155	-9	4.69042		3258.5	180.631		1	27.3618		3579.75	1164.48		0.25	1.25831		-78.5	26.7893		3652	555.69		593.25	243.876		-33	37.1035		11.25	9.84463		-33	37.1035
22	N4211	8.25	16.6408		50.5	75.3414		5534.5	689.167		-68.25	29.4095		4.75	4.11299		-66	12.9872		-89.75	10.1119		-8	13.3417		178.5	99.2992		-17.5	7.59386		160.5	124.307
23	N4212	15	22.286		54.75	66.52		1294	125.6		943	222.847		3	1.82574		-92.5	17.9351		-12.5	31.1395		1648	217.176		271.25	115.474		327	68.2593		46.5	33.8378
24	N4213	13	14.7196		0.5	25.41		1598	144.252		31	32.4654		0.5	8.73689		-2.25	20.0562		-8.25	19.6023		-7.5	12.4499		-25.25	15.2834		12	6.21825		-25.25	15.2834
25	N4214	3.5	3.10913		29	68.7556		5638.75	156.908		-54.25	9.06918		5.5	3.69685		-72	13.2162		-86	22.6127		-16.5	13.1022		-37.25	20.6942		-27.25	7.58837		-37.25	20.6942
26	N4215	19.5	17.1367		3961	61.46		-4	69.9285		1640.25	390.764		7	2.82843		-18.75	26.0816		5172.5	487.579		781	221.441		-35	20.8327		1264.5	326.901		-35	20.8327
27	N4222	8.25	21.9146		50.75	112.117		12	25.923		462.5	124.947		-1.25	2.21736		-38	59.9055		-14.75	32.7452		1170	272.504		1150.25	607.38		277.25	57.1744		843.25	250.254
28	N4223	2	9.79796		8.75	11.5		-19.75	47.3313		8.5	14.8212		1.75	1.25831		9.25	15.7771		9.5	21.7945		-2.5	8.22598		64.75	86.6271		9.25	6.07591		64.75	86.6271
29	N4224	11	8.40635		3.5	77.38		-24.25	34.1309		-113.5	70.5809		-2.25	2.06155		-113.25	36.573		-93.5	35.1236		-25.25	8.88351		496.25	192.157		-27	9.79796		496.25	192.157
30	N4225	31.75	10.0789		2336.75	288.246		-43.5	91.5696		1731.25	346.848		-2	1.63299		-85.25	13.1498		1986.25	49.6614		461.5	214.323		104.5	118.481		326	139.219		104.5	118.481
31	N4233	0.75	2.62996		-73	25.6515		-11.25	52.0344		3756.75	317.828		64	28.1306		100.5	7.04746		218.5	31.5859		862.75	76.6871		196	133.973		72.75	12.7639		196	133.973
32	N4234	12.75	31.7214		2.25	102.617		30	84.3682		2751.25	525.707		0.75	0.957427		-27.25	18.1728		27.5	22.0681		1286.75	109.886		146.5	206.159		0	8.86942		35.25	44.38
33	N4235	11.75	25.1578		2227	217.263		-42.5	65.2457		3540.5	606.446		-5	1.82574		-24.75	15.3052		7127	560.028		919.25	98.4932		88.5	42.4696		1818	335.505		67.25	42.0506
34	N4244	-2.5	12.3693		-15.75	119.014		-2.75	13.7447		-15.5	16.9411		-0.5	1.29099		19.75	14.6828		-58.75	26.5126		172.25	141.403		-15	20.4613		22	35.4213		-15	20.4613
35	N4245	7	11.6333		2105.75	122.138		-49.25	45.1617		1704.75	407.054		77.75	42.3586		238.5	11.8462		3707	356.116		699.5	220.845		-80.75	49.0535		7666.75	1711.29		-80.75	49.0535
36	N4255	15.5	15.8008		2850.5	218.508		-81	177.833		2318.75	173.75		-4	2.16025		-155	5.71548		1298	160.464		538.75	152.351		-160.5	127.767		582	37.1573		-160.5	127.767
37	N000	15.75	14.8857		37.75	127.144		31.5	71.8633		-32.5	41.5411		-1.25	2.62996		-19.5	83.5165		-77	26.3565		-24.75	31.4364		-29.5	24.1454		-5.75	7.5		-29.5	24.1454
38	N001	2.75	6.55108		58.75	86.1641		1.25	25.7083		-49.25	53.5187		-0.75	3.30404		-65.25	24.6627		-25.25	44.0104		26	53.1099		1452.25	290.26		-10.5	7.59386		1452.25	290.26
39	N002	-1.75	14.5917		46	51.5429		-1.5	17.9165		3152.5	332.17		-1.75	2.06155		24	24.1661		3816.5	371.876		951.5	237.852		318.75	215.826		650.75	350.385		436.5	81.5537
40	N003	-4	7.48331		97	93.5877		-14.5	75.0755		102.75	136.732		4319	1431.37		7290.75	500.567		-12	21.0713		849	132.32		-35	23.1517		2133.75	643.587		-35	23.1517
41	N004	36.5	41.509		46.75	85.7219		10.5	22.2486		-58.5	20.7284		0	2.16025		-58.75	46.5788		-56.25	39.0758		-11.5	6.55744		-29.75	22.4704		-18	8.44591		-29.5	22.7669
42	N005	6847.5	1013.35		8471	575.181		18	24.59		4482.75	1331.03		10.5	7.14143		107.25	33.8563		9066.75	984.394		1110.25	452.501		-58	51.8009		1061.75	247.57		-58	51.8009
43	N111	1	11.4018		75	65.0282		8	69.527		-146.5	46.7226		-0.5	2.64575		-60.5	48.4802		-50.25	43.9801		-19.5	13.0256		1568.25	552.409		-28.5	5.06623		1619.75	565.646
44	N112	24.5	24.8797		51.25	108.171		52	29.5184		4442.75	655.184		-3.25	1.70783		-42.25	29.4434		471.75	28.8256		1187.5	57.576		701.25	527.201		11	8.28654		-53.25	20.6135
45	N113	10.75	25.7083		43.5	65.7546		32	33.6947		-16.5	57.2742		3364	378.066		4505.5	779.45		-68	15.4272		556.75	215.265		-56.75	24.2813		633.25	85.8657		-56.75	24.2813
46	N114	56.75	53.823		78.75	79.4455		-8.75	20.1225		-86.5	17.7106		-0.5	0.57735		-81.5	35.8283		-42.75	28.5351		-25.75	24.7975		-20.5	9.32738		-15.5	14.2712		-20.5	9.32738
47	N115	8616.5	949.804		6119.75	205.926		-2.5	45.0222		2643.5	504.628		-3.75	2.62996		-7.5	21.2053		6163.75	383.282		991.25	213.678		-36.25	28.4649		9.5	4.43471		-36.25	28.4649
48	N122	1.75	12.6853		62.25	95.4302		18	34.2247		2051.75	188.876		-3.75	2.87228		-62	13.6382		171.25	71.0229		755	115.617		779	339.597		2.5	5.8023		-26.25	25.1711
49	N123	10.75	25.1578		-38	2.94392		-5.5	18.6994		93	38.4534		1286.75	325.86		1592.5	608.045		42	22.1058		112	101.64		688.75	490.102		286.25	65.4695		406.75	92.5288
50	N124	4.75	6.34429		121.25	54.9265		-18	57.5674		-85.5	61.8951		-1	1.1547		-79.5	25.632		-87.25	25.3295		-4.25	13.0735		260	187.807		-31.25	3.20156		260	187.807
51	N125	6238.75	620.518		4914.25	224.883		26.5	66.8855		3247.75	528.077		-0.5	1.29099		3.75	19.1898		4624	260.611		1189.75	457.44		1.75	19.4143		16.25	14.2449		1.75	19.4143
52	N133	15.25	30.6635		-43.75	18.3371		-57	76.3675		2776.5	336.426		2678	292.364		4069.75	577.033		181.75	13.6717		863.25	148.399		74.5	31.7122		5266	811.185		74.5	31.7122
53	N134	47.5	47.8922		0.5	63.9244		8.25	18.9978		2231.25	226.91		0.25	3.0957		-56.5	35.0381		62	11.9164		870.75	206.096		27.75	30.7287		120	17.9258		27.75	30.7287
54	N135	3487.75	520.561		3613.75	106.825		13	37.1214		3686.25	850.577		-0.75	1.5		41.5	14.1539		6369	617.666		1928.25	478.279		-7.25	12.5797		685.75	140.915		-7.25	12.5797
55	N144	3.25	7.27438		94.75	29.2959		32.25	23.838		3.5	12.0692		1873.5	483.437		3221.5	807.907		-62	25.923		14.75	15.8403		-33	19.6469		16	20.445		-33	19.6469
56	N145	4230.25	649.874		3556.75	342.4		10.5	18.735		3910.5	1092.02		1739.5	278.082		3870.75	520.922		5223.25	169.319		781.75	172.014		-28.75	15.2179		145.5	48.1144		-29	15.3623
57	N155	3848	239.045		4287.75	553.735		-10	46.2817		4273.5	507.626		-2.25	2.87228		-55.25	28.5117		3094	85.4361		1246.25	262.668		-54	10.0333		-8	3.74166		-54	10.0333
58	N211	-0.25	4.57347		1.5	14.0119		-48.75	26.4874		-125.75	26.437		-0.25	2.98608		-71	17.1075		-44.25	10.1448		-23.5	5.91608		542.75	286.382		-33.25	2.98608		-0.75	24.6221
59	N212	18.75	29.7139		1.5	13.9881		7.5	34.8569		1953.25	210.085		-2	4.32049		-27.25	29.9708		111	34.938		1293.25	54.5611		572.5	563.043		187	37.5322		86.75	152.662
60	N213	4	11.1654		31	54.4488		2.75	15.174		85	24.8596		3122	312.802		4882	629.899		-27.5	13.6991		252.25	100.098		-62	15.748		24.25	3.20156		-62	15.748
61	N214	4	14.4453		46.75	73.077		-3.75	15.327		-52.25	29.9597		-2.5	3.10913		-38.75	20.106		-32.75	34.8461		-15.25	14.6373		-41.5	33.1713		-36	13.2162		-41.5	33.1713
62	N215	1119.25	261.476		5421.25	648.478		10.25	28.3358		2559.5	613.308		0.5	5.8023		24.5	20.1412		7817.5	1158.06		787.5	244.564		-19	33.0454		-2.25	5.31507		-19	33.0454
63	N222	-3.75	5.56028		43.5	66.4053		4.25	29.8147		1128.75	92.9565		-0.5	2.08167		-58.75	11.8708		55.5	16.9214		912.75	342.877		873	272.374		233.25	56.759		855	251.503
64	N223	11.25	7.5		49	59.8498		48.75	47.6541		-12.25	53.3565		3673	566.479		3010.5	374.264		-97.5	26.6396		117.25	90.0347		152.5	33.5211		10.25	6.55108		152.5	33.5211
65	N224	15.25	16.7407		49	101.591		-53.75	44.8061		-109.25	42.9525		-1.5	2.51661		-82	20.4124		-60	19.9666		-11.25	12.3119		537.5	302.406		-39.5	10.1489		82	143.887
66	N225	22	28.1425		4463	332.474		-93.5	66.2596		2868.25	355.04		-2.75	1.25831		-16	15.7692		5452	500.055		1508.25	466.891		111.75	36.0959		127.75	9.17878		111.75	36.0959
67	N233	7.25	10.2429		-22.75	28.0401		-124	22.301		3606.5	486.899		3330.75	311.373		3540.75	1050.46		200.5	57.7725		1227.75	304.547		495.5	190.145		102.75	6.84957		44.75	168.223
68	N234	9.75	10.0125		60.75	63.1104		-35.25	79.9432		1683	109.945		-2	5.35413		-64.75	2.87228		62.25	21.0456		1696.25	463.257		479.5	417.753		-21.5	5.91608		-7.75	113.907
69	N235	16.25	9.74252		1899.5	79.4082		-17.75	18.536		2860.75	116.193		-0.75	2.75379		100.75	60.731		5173	719.573		1711.25	263.453		7.75	37.4288		370.75	44.4025		7.75	37.4288
70	N244	-3	2.3094		-1.75	61.1303		-48.75	51.7454		-24.5	19.07		1993.5	272.069		1596	171.412		-83	31.2197		39.75	22.2617		-26.25	16.5806		130.5	33.7688		-26.25	16.5806
71	N245	12	10.0995		2679.25	278.693		-119.5	43.4856		3166.5	99.7747		4671.25	1714.63		2544.25	420.264		4105.25	512.977		1182.25	93.7279		-89	30.7354		2888.25	656.699		-89	30.7354
72	N255	26.5	22.4574		3566	544.925		25	100.936		2463	371.463		-0.5	1.73205		-42	8.3666		3184.5	377.78		882.5	67.7077		-67.75	41.7403		44.5	48.1698		-67.75	41.7403
73	A3LNnT	74.5	76.857		-42.75	4.272		-47.75	84.9407		5419	109.502		4.5	3.10913		146.25	27.5726		3816.75	483.077		1581	64.2962		823.75	262.194		53	18.2574		823.75	262.194
74	A6LNnT	19.5	25.9808		7.5	71.0985		-30	35.805		1117.25	122.454		4528.75	389.264		13878	211.043		76.25	18.0808		1351	391.081		723	682.361		1404.5	255.009		-35	28.1543
	NC	17	11.225		49	59.8721		59.75	71.8813		65.5	56.9005		2.75	2.98608		80.5	54.3354		233	13.3915		-5	4.24264		-9.25	62.6492		11.25	9.87843		-9.25	62.6492
	PC1	-3.25	7.13559		6.75	43.4693		15	27.5318		15.5	21.1896		1.5	5.19615		16	19.2007		18.75	11.1766		1.25	10.9962		12.25	22.1717		-14.25	10.5633		12.25	22.1717
	PC2	6664.5	449.641		32800.5	988.468		14804.5	734.878		9147.25	353.578		10946.8	390.401		9473.25	359.793		9908.25	764.35		8366.5	318.658		12467.8	407.777		64354	1413.08		12467.8	407.777
	PC3	20655	2011.91		104.5	16.8226		18126	1095.83		16225.8	860.905		16871.5	1058.98		14765.5	1358.55		16874	1246		19886.5	611.069		65103.2	59.253		716	32.3831		65103.2	59.253
	PCA	49714.2	1175.33		23.25	63.7672		40879.8	2265.87		39009.5	866.453		45619	1564.38		48841.2	1892.12		51825	2866.78		44943	924.351		65238.5	56.3708		7213.25	377.051		65238.5	56.3708
	M	28457.8	234.698		23870.8	264.632		22459	877.615		22260	906.89		25002	856.15		23932.2	636.507		28124.5	1429.22		26020.8	1102.71		65369.8	21.7926		53506	3276.74		65369.8	21.7926

## Sheet: All Structure
Glycan ID	Glycan Name
1	GlcNAcb1-2Mana1-6(GlcNAcb1-4)(GlcNAcb1-2Mana1-3)Manb1-4GlcNAcb1-4GlcNAc-AEAB
2	Galb1-4GlcNAcb1-2Mana1-6(GlcNAcb1-4)(Galb1-4GlcNAcb1-2Mana1-3)Manb1-4GlcNAcb1-4GlcNAc-AEAB
3	Neu5Aca2-3Galb1-4GlcNAcb1-2Mana1-6(GlcNAcb1-4)(Neu5Aca2-3Galb1-4GlcNAcb1-2Mana1-3)Manb1-4GlcNAcb1-4GlcNAc-AEAB
4	Neu5Aca2-6Galb1-4GlcNAcb1-2Mana1-6(GlcNAcb1-4)(Neu5Aca2-6Galb1-4GlcNAcb1-2Mana1-3)Manb1-4GlcNAcb1-4GlcNAc-AEAB
5	Galb1-4(Fuca1-3)GlcNAcb1-2Mana1-6(GlcNAcb1-4)(Galb1-4(Fuca1-3)GlcNAcb1-2Mana1-3)Manb1-4GlcNAcb1-4GlcNAc-AEAB
6	Neu5Aca2-3Galb1-4(Fuca1-3)GlcNAcb1-2Mana1-6(GlcNAcb1-4)(Neu5Aca2-3Galb1-4(Fuca1-3)GlcNAcb1-2Mana1-3)Manb1-4GlcNAcb1-4GlcNAc-AEAB
7	GlcNAcb1-2Mana1-6(GlcNAcb1-4)(Galb1-4GlcNAcb1-2Mana1-3)Manb1-4GlcNAcb1-4GlcNAc-AEAB
8	GlcNAcb1-2Mana1-6(GlcNAcb1-4)(Neu5Aca2-3Galb1-4GlcNAcb1-2Mana1-3)Manb1-4GlcNAcb1-4GlcNAc-AEAB
9	GlcNAcb1-2Mana1-6(GlcNAcb1-4)(Neu5Aca2-6Galb1-4GlcNAcb1-2Mana1-3)Manb1-4GlcNAcb1-4GlcNAc-AEAB
10	GlcNAcb1-2Mana1-6(GlcNAcb1-4)(Galb1-4(Fuca1-3)GlcNAcb1-2Mana1-3)Manb1-4GlcNAcb1-4GlcNAc-AEAB
11	GlcNAcb1-2Mana1-6(GlcNAcb1-4)(Neu5Aca2-3Galb1-4(Fuca1-3)GlcNAcb1-2Mana1-3)Manb1-4GlcNAcb1-4GlcNAc-AEAB
12	Galb1-4GlcNAcb1-2Mana1-6(GlcNAcb1-4)(Neu5Aca2-3Galb1-4GlcNAcb1-2Mana1-3)Manb1-4GlcNAcb1-4GlcNAc-AEAB
13	Galb1-4GlcNAcb1-2Mana1-6(GlcNAcb1-4)(Neu5Aca2-6Galb1-4GlcNAcb1-2Mana1-3)Manb1-4GlcNAcb1-4GlcNAc-AEAB
14	Galb1-4GlcNAcb1-2Mana1-6(GlcNAcb1-4)(Galb1-4(Fuca1-3)GlcNAcb1-2Mana1-3)Manb1-4GlcNAcb1-4GlcNAc-AEAB
15	Galb1-4GlcNAcb1-2Mana1-6(GlcNAcb1-4)(Neu5Aca2-3Galb1-4(Fuca1-3)GlcNAcb1-2Mana1-3)Manb1-4GlcNAcb1-4GlcNAc-AEAB
16	Neu5Aca2-3Galb1-4GlcNAcb1-2Mana1-6(GlcNAcb1-4)(Neu5Aca2-6Galb1-4GlcNAcb1-2Mana1-3)Manb1-4GlcNAcb1-4GlcNAc-AEAB
17	Neu5Aca2-3Galb1-4GlcNAcb1-2Mana1-6(GlcNAcb1-4)(Galb1-4(Fuca1-3)GlcNAcb1-2Mana1-3)Manb1-4GlcNAcb1-4GlcNAc-AEAB
18	Neu5Aca2-3Galb1-4GlcNAcb1-2Mana1-6(GlcNAcb1-4)(Neu5Aca2-3Galb1-4(Fuca1-3)GlcNAcb1-2Mana1-3)Manb1-4GlcNAcb1-4GlcNAc-AEAB
19	Neu5Aca2-6Galb1-4GlcNAcb1-2Mana1-6(GlcNAcb1-4)(Galb1-4(Fuca1-3)GlcNAcb1-2Mana1-3)Manb1-4GlcNAcb1-4GlcNAc-AEAB
20	Neu5Aca2-6Galb1-4GlcNAcb1-2Mana1-6(GlcNAcb1-4)(Neu5Aca2-3Galb1-4(Fuca1-3)GlcNAcb1-2Mana1-3)Manb1-4GlcNAcb1-4GlcNAc-AEAB
21	Galb1-4(Fuca1-3)GlcNAcb1-2Mana1-6(GlcNAcb1-4)(Neu5Aca2-3Galb1-4(Fuca1-3)GlcNAcb1-2Mana1-3)Manb1-4GlcNAcb1-4GlcNAc-AEAB
22	Galb1-4GlcNAcb1-2Mana1-6(GlcNAcb1-4)(GlcNAcb1-2Mana1-3)Manb1-4GlcNAcb1-4GlcNAc-AEAB
23	Neu5Aca2-3Galb1-4GlcNAcb1-2Mana1-6(GlcNAcb1-4)(GlcNAcb1-2Mana1-3)Manb1-4GlcNAcb1-4GlcNAc-AEAB
24	Neu5Aca2-6Galb1-4GlcNAcb1-2Mana1-6(GlcNAcb1-4)(GlcNAcb1-2Mana1-3)Manb1-4GlcNAcb1-4GlcNAc-AEAB
25	Galb1-4(Fuca1-3)GlcNAcb1-2Mana1-6(GlcNAcb1-4)(GlcNAcb1-2Mana1-3)Manb1-4GlcNAcb1-4GlcNAc-AEAB
26	Neu5Aca2-3Galb1-4(Fuca1-3)GlcNAcb1-2Mana1-6(GlcNAcb1-4)(GlcNAcb1-2Mana1-3)Manb1-4GlcNAcb1-4GlcNAc-AEAB
27	Neu5Aca2-3Galb1-4GlcNAcb1-2Mana1-6(GlcNAcb1-4)(Galb1-4GlcNAcb1-2Mana1-3)Manb1-4GlcNAcb1-4GlcNAc-AEAB
28	Neu5Aca2-6Galb1-4GlcNAcb1-2Mana1-6(GlcNAcb1-4)(Galb1-4GlcNAcb1-2Mana1-3)Manb1-4GlcNAcb1-4GlcNAc-AEAB
29	Galb1-4(Fuca1-3)GlcNAcb1-2Mana1-6(GlcNAcb1-4)(Galb1-4GlcNAcb1-2Mana1-3)Manb1-4GlcNAcb1-4GlcNAc-AEAB
30	Neu5Aca2-3Galb1-4(Fuca1-3)GlcNAcb1-2Mana1-6(GlcNAcb1-4)(Galb1-4GlcNAcb1-2Mana1-3)Manb1-4GlcNAcb1-4GlcNAc-AEAB
31	Neu5Aca2-6Galb1-4GlcNAcb1-2Mana1-6(GlcNAcb1-4)(Neu5Aca2-3Galb1-4GlcNAcb1-2Mana1-3)Manb1-4GlcNAcb1-4GlcNAc-AEAB
32	Neu5Aca2-3Galb1-4GlcNAcb1-2Mana1-6(GlcNAcb1-4)(Neu5Aca2-3Galb1-4GlcNAcb1-2Mana1-3)Manb1-4GlcNAcb1-4GlcNAc-AEAB
33	Neu5Aca2-3Galb1-4(Fuca1-3)GlcNAcb1-2Mana1-6(GlcNAcb1-4)(Neu5Aca2-3Galb1-4GlcNAcb1-2Mana1-3)Manb1-4GlcNAcb1-4GlcNAc-AEAB
34	Galb1-4(Fuca1-3)GlcNAcb1-2Mana1-6(GlcNAcb1-4)(Neu5Aca2-6Galb1-4GlcNAcb1-2Mana1-3)Manb1-4GlcNAcb1-4GlcNAc-AEAB
35	Neu5Aca2-3Galb1-4(Fuca1-3)GlcNAcb1-2Mana1-6(GlcNAcb1-4)(Neu5Aca2-6Galb1-4GlcNAcb1-2Mana1-3)Manb1-4GlcNAcb1-4GlcNAc-AEAB
36	Neu5Aca2-3Galb1-4(Fuca1-3)GlcNAcb1-2Mana1-6(GlcNAcb1-4)(Galb1-4(Fuca1-3)GlcNAcb1-2Mana1-3)Manb1-4GlcNAcb1-4GlcNAc-AEAB
37	GlcNAcb1-2Mana1-6(GlcNAcb1-2Mana1-3)Manb1-4GlcNAcb1-4GlcNAc-AEAB
38	Galb1-4GlcNAcb1-2Mana1-6(Galb1-4GlcNAcb1-2Mana1-3)Manb1-4GlcNAcb1-4GlcNAc-AEAB
39	Neu5Aca2-3Galb1-4GlcNAcb1-2Mana1-6(Neu5Aca2-3Galb1-4GlcNAcb1-2Mana1-3)Manb1-4GlcNAcb1-4GlcNAc-AEAB
40	Neu5Aca2-6Galb1-4GlcNAcb1-2Mana1-6(Neu5Aca2-6Galb1-4GlcNAcb1-2Mana1-3)Manb1-4GlcNAcb1-4GlcNAc-AEAB
41	Galb1-4(Fuca1-3)GlcNAcb1-2Mana1-6(Galb1-4(Fuca1-3)GlcNAcb1-2Mana1-3)Manb1-4GlcNAcb1-4GlcNAc-AEAB
42	Neu5Aca2-3Galb1-4(Fuca1-3)GlcNAcb1-2Mana1-6(Neu5Aca2-3Galb1-4(Fuca1-3)GlcNAcb1-2Mana1-3)Manb1-4GlcNAcb1-4GlcNAc-AEAB
43	GlcNAcb1-2Mana1-6(Galb1-4GlcNAcb1-2Mana1-3)Manb1-4GlcNAcb1-4GlcNAc-AEAB
44	GlcNAcb1-2Mana1-6(Neu5Aca2-3Galb1-4GlcNAcb1-2Mana1-3)Manb1-4GlcNAcb1-4GlcNAc-AEAB
45	GlcNAcb1-2Mana1-6(Neu5Aca2-6Galb1-4GlcNAcb1-2Mana1-3)Manb1-4GlcNAcb1-4GlcNAc-AEAB
46	GlcNAcb1-2Mana1-6(Galb1-4(Fuca1-3)GlcNAcb1-2Mana1-3)Manb1-4GlcNAcb1-4GlcNAc-AEAB
47	GlcNAcb1-2Mana1-6(Neu5Aca2-3Galb1-4(Fuca1-3)GlcNAcb1-2Mana1-3)Manb1-4GlcNAcb1-4GlcNAc-AEAB
48	Galb1-4GlcNAcb1-2Mana1-6(Neu5Aca2-3Galb1-4GlcNAcb1-2Mana1-3)Manb1-4GlcNAcb1-4GlcNAc-AEAB
49	Galb1-4GlcNAcb1-2Mana1-6(Neu5Aca2-6Galb1-4GlcNAcb1-2Mana1-3)Manb1-4GlcNAcb1-4GlcNAc-AEAB
50	Galb1-4GlcNAcb1-2Mana1-6(Galb1-4(Fuca1-3)GlcNAcb1-2Mana1-3)Manb1-4GlcNAcb1-4GlcNAc-AEAB
51	Galb1-4GlcNAcb1-2Mana1-6(Neu5Aca2-3Galb1-4(Fuca1-3)GlcNAcb1-2Mana1-3)Manb1-4GlcNAcb1-4GlcNAc-AEAB
52	Neu5Aca2-3Galb1-4GlcNAcb1-2Mana1-6(Neu5Aca2-6Galb1-4GlcNAcb1-2Mana1-3)Manb1-4GlcNAcb1-4GlcNAc-AEAB
53	Neu5Aca2-3Galb1-4GlcNAcb1-2Mana1-6(Galb1-4(Fuca1-3)GlcNAcb1-2Mana1-3)Manb1-4GlcNAcb1-4GlcNAc-AEAB
54	Neu5Aca2-3Galb1-4GlcNAcb1-2Mana1-6(Neu5Aca2-3Galb1-4(Fuca1-3)GlcNAcb1-2Mana1-3)Manb1-4GlcNAcb1-4GlcNAc-AEAB
55	Neu5Aca2-6Galb1-4GlcNAcb1-2Mana1-6(Galb1-4(Fuca1-3)GlcNAcb1-2Mana1-3)Manb1-4GlcNAcb1-4GlcNAc-AEAB
56	Neu5Aca2-6Galb1-4GlcNAcb1-2Mana1-6(Neu5Aca2-3Galb1-4(Fuca1-3)GlcNAcb1-2Mana1-3)Manb1-4GlcNAcb1-4GlcNAc-AEAB
57	Galb1-4(Fuca1-3)GlcNAcb1-2Mana1-6(Neu5Aca2-3Galb1-4(Fuca1-3)GlcNAcb1-2Mana1-3)Manb1-4GlcNAcb1-4GlcNAc-AEAB
58	Galb1-4GlcNAcb1-2Mana1-6(GlcNAcb1-2Mana1-3)Manb1-4GlcNAcb1-4GlcNAc-AEAB
59	Neu5Aca2-3Galb1-4GlcNAcb1-2Mana1-6(GlcNAcb1-2Mana1-3)Manb1-4GlcNAcb1-4GlcNAc-AEAB
60	Neu5Aca2-6Galb1-4GlcNAcb1-2Mana1-6(GlcNAcb1-2Mana1-3)Manb1-4GlcNAcb1-4GlcNAc-AEAB
61	Galb1-4(Fuca1-3)GlcNAcb1-2Mana1-6(GlcNAcb1-2Mana1-3)Manb1-4GlcNAcb1-4GlcNAc-AEAB
62	Neu5Aca2-3Galb1-4(Fuca1-3)GlcNAcb1-2Mana1-6(GlcNAcb1-2Mana1-3)Manb1-4GlcNAcb1-4GlcNAc-AEAB
63	Neu5Aca2-3Galb1-4GlcNAcb1-2Mana1-6(Galb1-4GlcNAcb1-2Mana1-3)Manb1-4GlcNAcb1-4GlcNAc-AEAB
64	Neu5Aca2-6Galb1-4GlcNAcb1-2Mana1-6(Galb1-4GlcNAcb1-2Mana1-3)Manb1-4GlcNAcb1-4GlcNAc-AEAB
65	Galb1-4(Fuca1-3)GlcNAcb1-2Mana1-6(Galb1-4GlcNAcb1-2Mana1-3)Manb1-4GlcNAcb1-4GlcNAc-AEAB
66	Neu5Aca2-3Galb1-4(Fuca1-3)GlcNAcb1-2Mana1-6(Galb1-4GlcNAcb1-2Mana1-3)Manb1-4GlcNAcb1-4GlcNAc-AEAB
67	Neu5Aca2-6Galb1-4GlcNAcb1-2Mana1-6(Neu5Aca2-3Galb1-4GlcNAcb1-2Mana1-3)Manb1-4GlcNAcb1-4GlcNAc-AEAB
68	Neu5Aca2-3Galb1-4GlcNAcb1-2Mana1-6(Neu5Aca2-3Galb1-4GlcNAcb1-2Mana1-3)Manb1-4GlcNAcb1-4GlcNAc-AEAB
69	Neu5Aca2-3Galb1-4(Fuca1-3)GlcNAcb1-2Mana1-6(Neu5Aca2-3Galb1-4GlcNAcb1-2Mana1-3)Manb1-4GlcNAcb1-4GlcNAc-AEAB
70	Galb1-4(Fuca1-3)GlcNAcb1-2Mana1-6(Neu5Aca2-6Galb1-4GlcNAcb1-2Mana1-3)Manb1-4GlcNAcb1-4GlcNAc-AEAB
71	Neu5Aca2-3Galb1-4(Fuca1-3)GlcNAcb1-2Mana1-6(Neu5Aca2-6Galb1-4GlcNAcb1-2Mana1-3)Manb1-4GlcNAcb1-4GlcNAc-AEAB
72	Neu5Aca2-3Galb1-4(Fuca1-3)GlcNAcb1-2Mana1-6(Galb1-4(Fuca1-3)GlcNAcb1-2Mana1-3)Manb1-4GlcNAcb1-4GlcNAc-AEAB
73	Neu5Aca2-3Galb1-4GlcNAcb1-3Galb1-4Glc-AEAB
74	Neu5Aca2-6Galb1-4GlcNAcb1-3Galb1-4Glc-AEAB
